# Supplementary material for: Inhibition of Autophagic Degradation Process Contributes to Claudin-2 Expression Increase and Epithelial Tight Junction Dysfunction in TNF-α Treated Cell Monolayers
Source: PubMed Central journal article supplement (PMC5297790; doi:10.3390/ijms18010157), 2017-01-17
Supplement: ijms-18-00157-s001.pdf [file ijms-18-00157-s001.pdf]

# Supplementary Materials: Inhibition of Autophagic Degradation Process Contributes to Claudin-2 Expression Increase and Epithelial Tight Junction Dysfunction in TNF- $\alpha$ Treated Cell Monolayers

Cong Zhang, Junkai Yan, Yongtao Xiao, Yujie Shen, Jiazheng Wang, Wensong Ge and Yingwei Chen

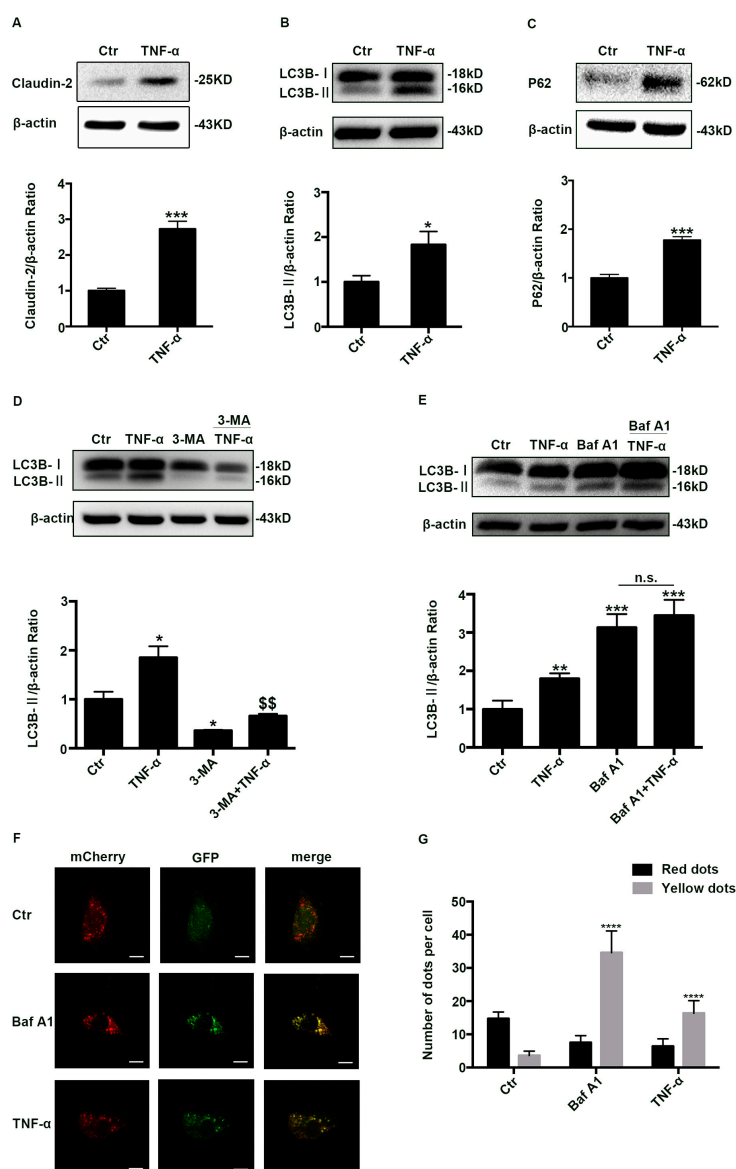

**Figure S1.** Claudin-2 increase and impaired autophagic flux in TNF- $\alpha$  treated IEC-6 cell monolayers. (A–C) Western blotting analysis of claudin-2, LC3B-II and P62 protein in IEC-6 cells after TNF- $\alpha$  (20 ng/mL, 48 h) treatment. (D,E) Western blot analysis of LC3B-II in cells treated with TNF- $\alpha$  (20 ng/mL) in the presence or absence of 3-MA (5 mM) or Baf A1 (100 nM) pretreatment. (F) Representative images of IEC-6 cells transfected with ad-mCherry-GFP-LC3B adenovirus after TNF- $\alpha$  (20 ng/mL) or Baf A1 treatment (100 nM). Scale bar: 10  $\mu$ m. (G) The number of red and yellow LC3 dots per cell were counted under confocal microscope (>30 cells/group). Data were shown as mean  $\pm$  SD and replicated in 3 times. \*  $p < 0.05$ , \*\*  $p < 0.01$ , \*\*\*  $p < 0.001$ , \*\*\*\*  $p < 0.0001$  versus control group. \$\$  $p < 0.01$  versus 3-MA group. n.s., no significant versus TNF- $\alpha$  group. Ctr, control group; 3-MA, 3-methyladenine; Baf A1, Bafilomycin A1.

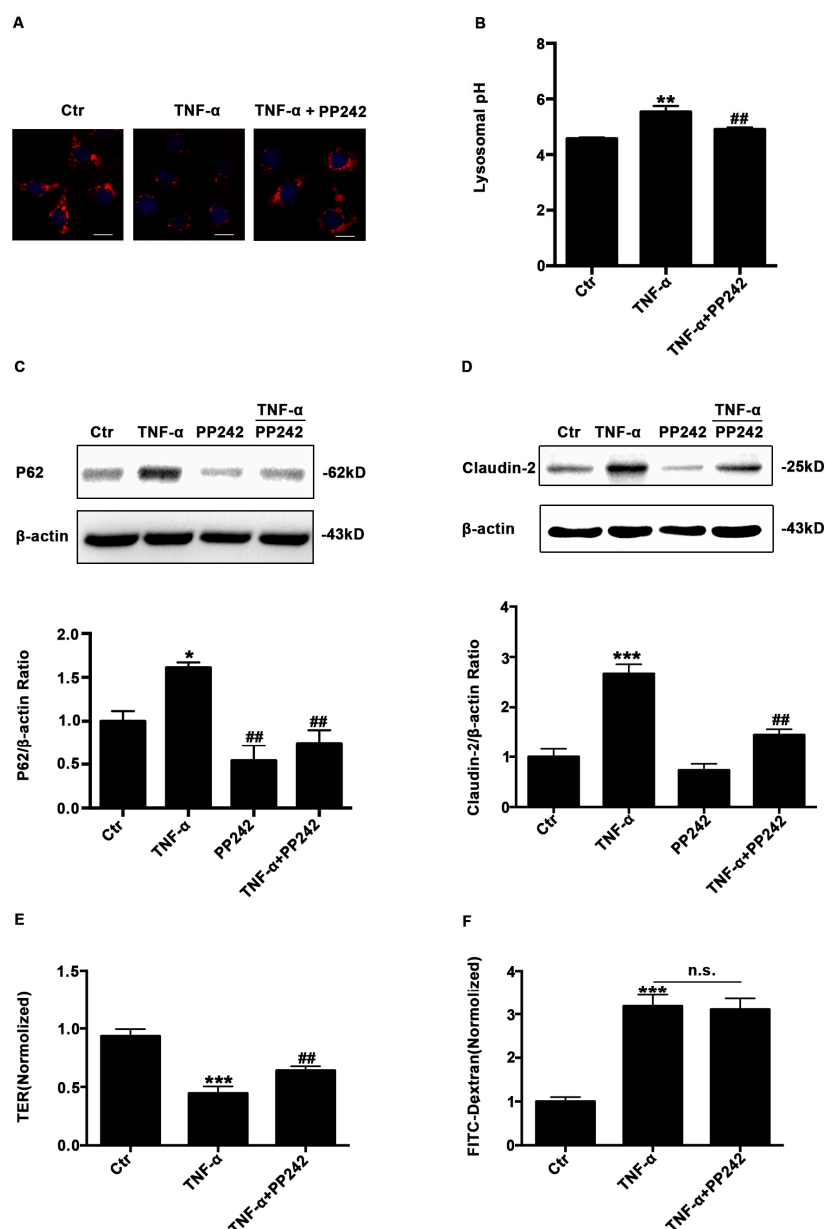

**Figure S2.** The effect of PP242 on the change of lysosomal pH, autophagic flux, claudin-2 and intestinal barrier function induced by TNF- $\alpha$  in IEC-6 cell monolayers. **(A)** Images of IEC-6 cells labeled with Lysotracker Red DND-99 dye after TNF- $\alpha$  (20 ng/mL, 48 h) and/or PP242 (1  $\mu$ M, 24 h) treatment. Scale bar: 15  $\mu$ m. **(B)** Lysosomal pH changes of IEC-6 cells labeled with Lysosensor Yellow/Blue DND-160 after TNF- $\alpha$  and/or PP242 treatment. **(C,D)** Western blot analysis of P62 and claudin-2 protein during TNF- $\alpha$  and/or PP242 treatment. **(E,F)** The effect of PP242 in TER and the permeability of the FITC-dextran in TNF- $\alpha$  treated IEC-6 cell monolayers. Data were shown as mean  $\pm$  SD and replicated in 3 times. \*  $p < 0.05$ , \*\*  $p < 0.01$ , \*\*\*  $p < 0.001$  versus control group. ##  $p < 0.01$  versus TNF- $\alpha$  group. n.s., no significant versus TNF- $\alpha$  group. Ctrl, control group.
